# Supplementary material for: Lyophilization Based Isolation of Exosomes
Source: MDPI journal article supplement (doi:10.3390/ijms241310477), 2023-06-22
Supplement: s1 [file s1]

## Supplementary data

# Lyophilization Based Isolation of Exosomes

**Rida e Maria Qazi <sup>1,†</sup>, Zahra Sajid <sup>1,†</sup>, Chunqiu Zhao <sup>2</sup>, Irfan Hussain <sup>1</sup>, Fizza Iftikhar <sup>1</sup>,  
Muhammad Jameel <sup>1</sup>, Fawad Ur Rehman <sup>1,\*</sup> and Afsar Ali Mian <sup>1,\*</sup>**

<sup>1</sup> Centre for Regenerative Medicine and Stem Cells Research, The Aga Khan University, 1st  
Flour, Juma Building, Stadium Road, Karachi 74800, Sindh, Pakistan

<sup>2</sup> State Key Lab of Bioelectronics, Southeast University, Sipailou 2, Nanjing 210096, China

\* Correspondence: rehman.fawad@aku.edu (F.U.R.); afsar.mian@aku.edu (A.A.M.)

† These authors contributed equally to this work.

**Supporting Figures:**

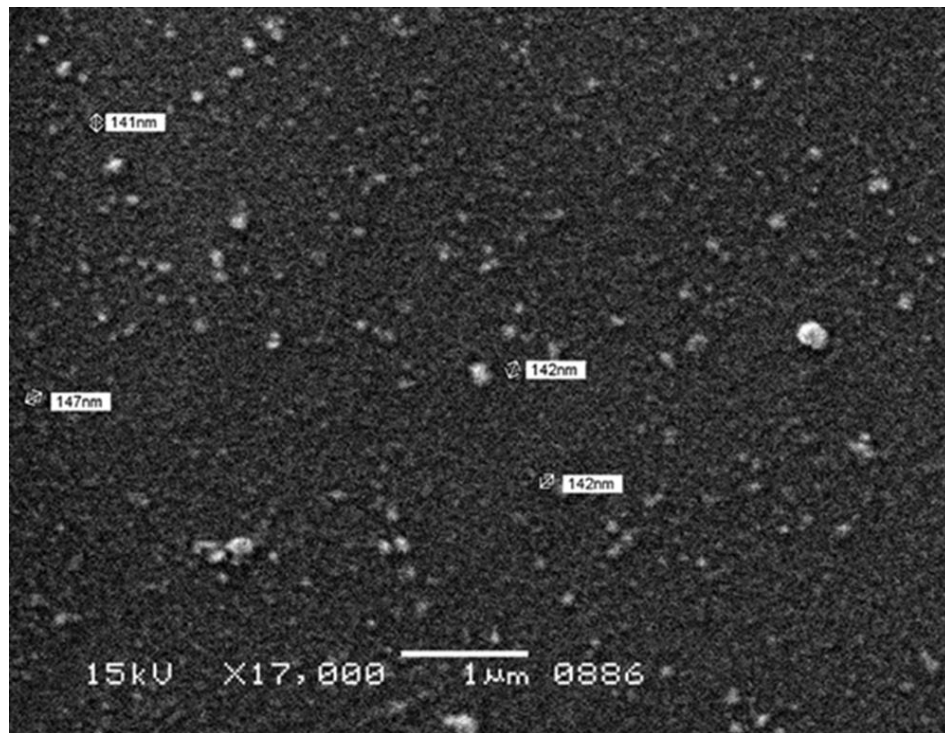

**Figure S1.** Scanning electron micrographs of exosomes isolated from Ba/F3-P185 cells.

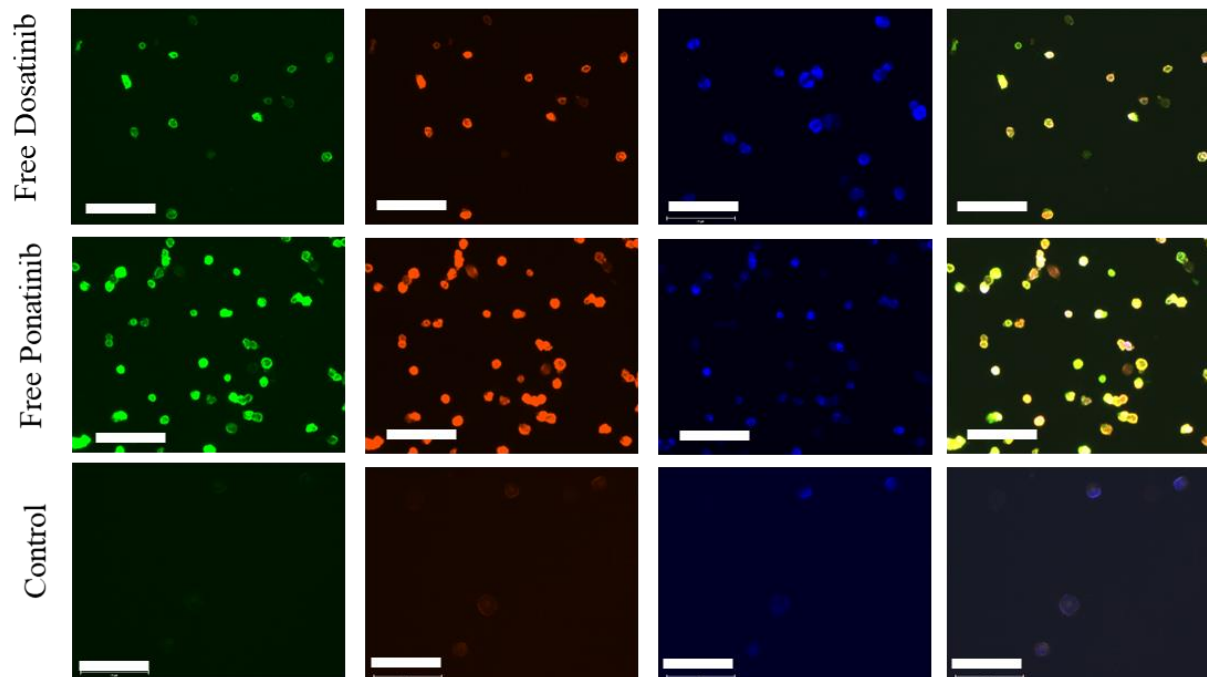

**Figure S2.** K562 controls for apoptosis effect after various free tyrosine kinase inhibitors.

Effect under a fluorescence microscope. The scale bar is 75  $\mu\text{m}$ .

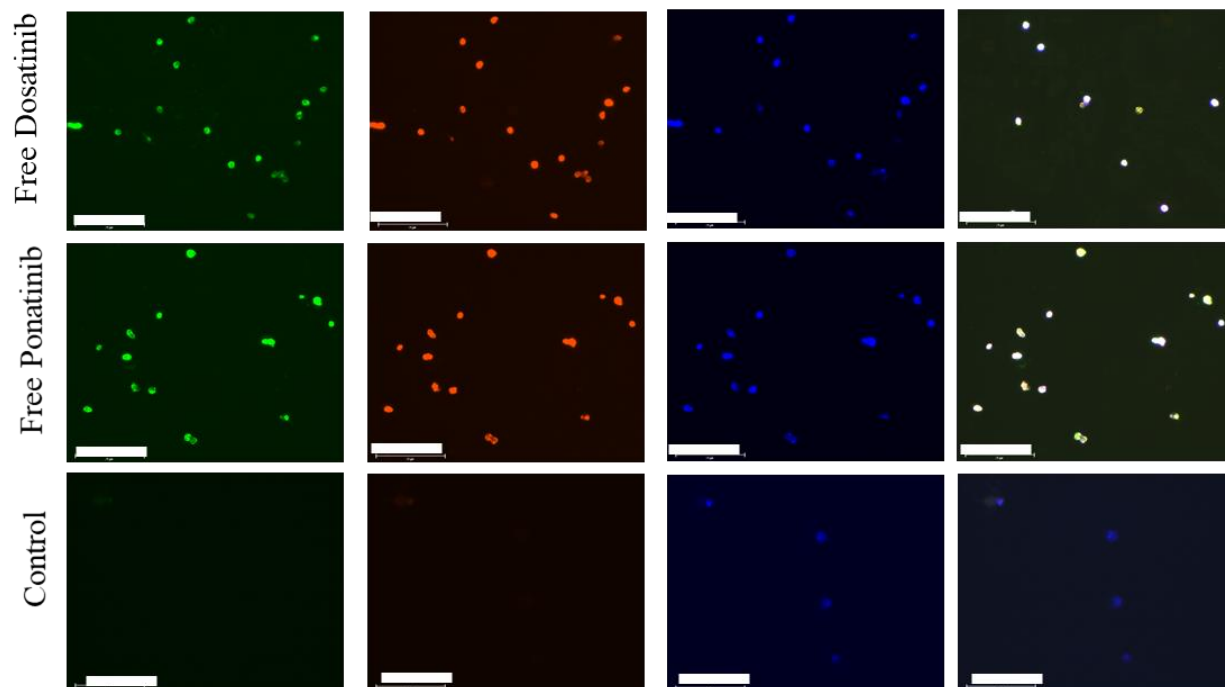

**Figure S3.** Ba/F3-P185 controls for apoptosis effect after various free tyrosine kinase inhibitors.

Effect under a fluorescence microscope. The scale bar is 75  $\mu\text{m}$ .

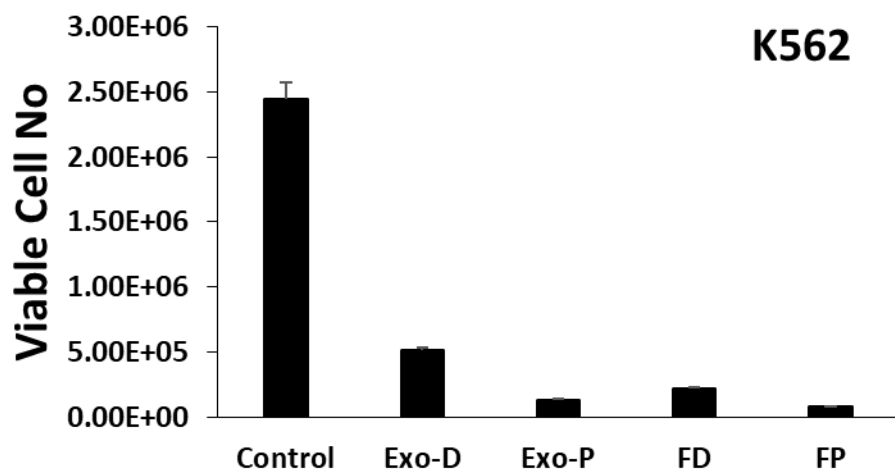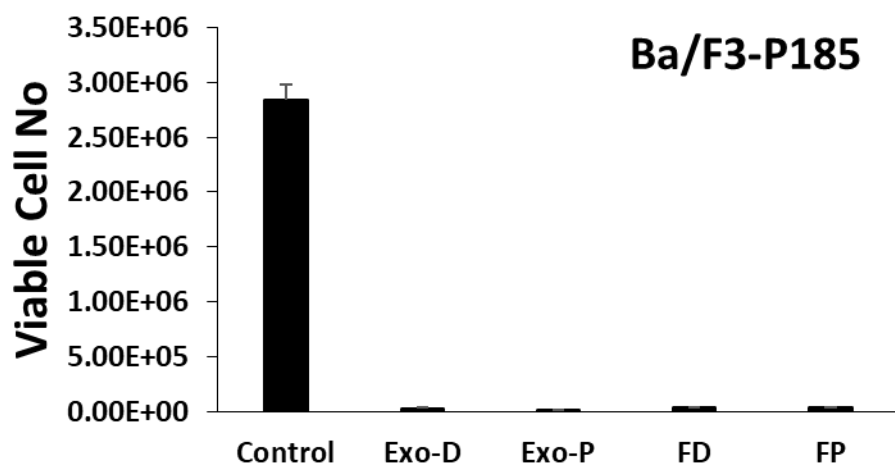

**Figure S4.** Viable cell count after treatment of K562 and Ba/F3-P185 cells with drug-loaded exosomes. Exo-P refers to exosomes with ponatinib, Exo-D refers to exosomes with ponatinib, whereas FP and FD represent free ponatinib and free dasatinib, respectively.

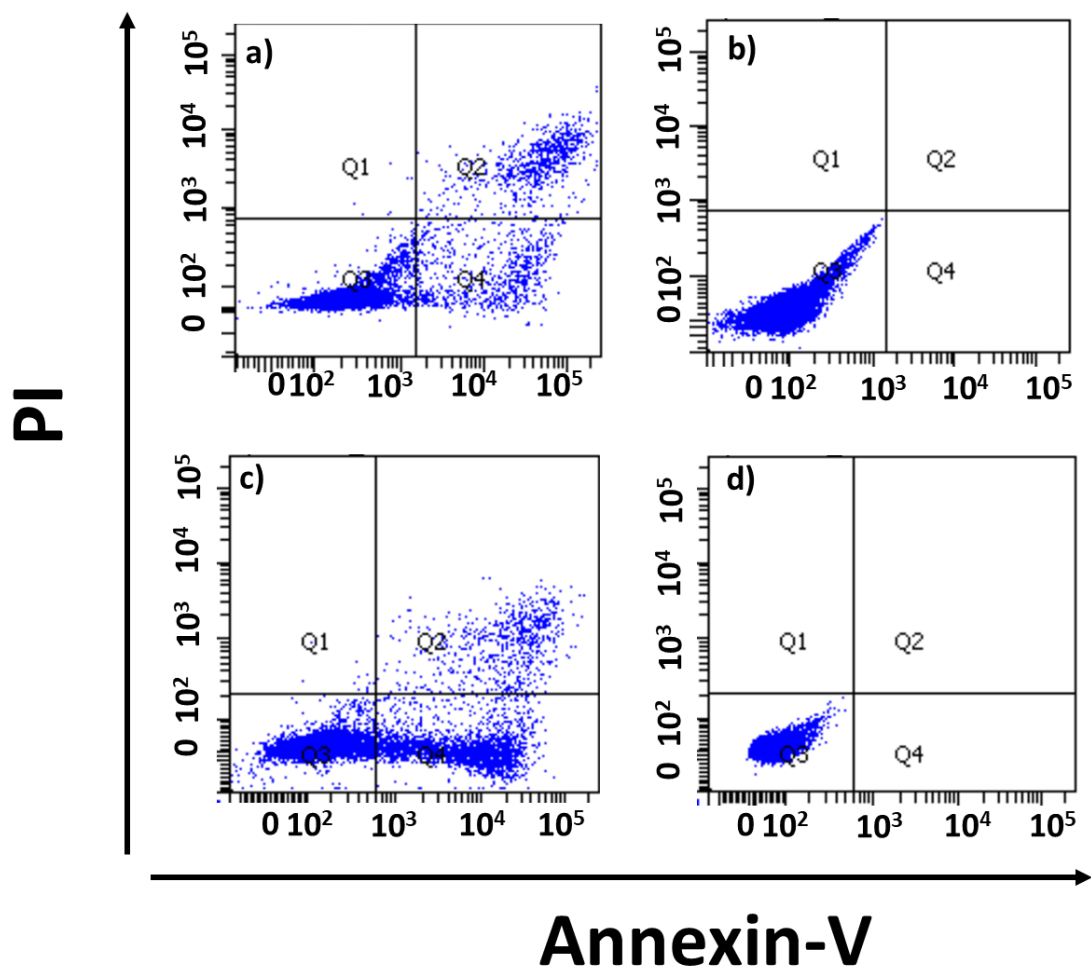

**Figure S5.** Flow cytometry data of Annexin V- PI stained and unstained controls of treated K562 (a, b) and Ba/F3-P185 (c, d) cells, respectively.

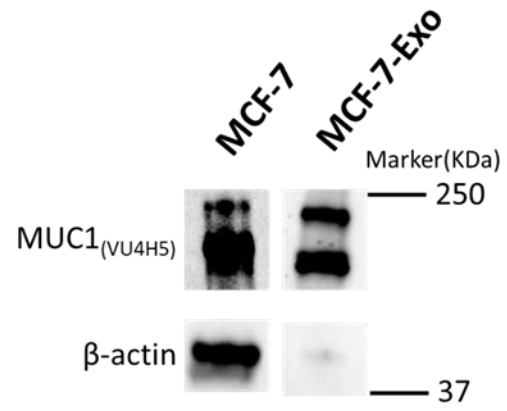

**Figure S6.** Western blots of MUC1 Protein expressed on the MCF7 cells and their exosomes isolated via the lyophilization method. β-actin was run as a control.
